# Supplementary material
Source: MDPI journal article supplement (https://www.mdpi.com/2079-6412/8/1/8)
Supplement: s1 [file s1]

# Supplementary Materials: Polymeric Antimicrobial Coatings Based on Quaternary Ammonium Compounds

Denisa Druvari, Nikos D. Koromilas, Vlasoula Bekiari, Georgios Bokias and Joannis K. Kallitsis

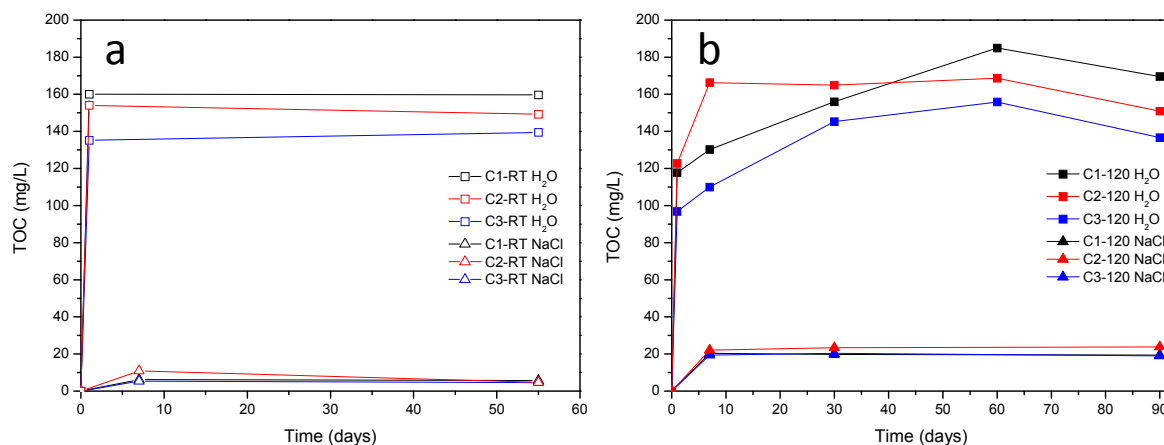

**Figure S1.** Evolution of the TOC values of the solutions, after immersion in ultra-pure water and aqueous NaCl 1 M solution for different time periods of: (a) Uncured C1-RT, C2-RT, C3-RT polymeric coatings, and (b) Cured C1-120, C2-120, C3-120 polymeric coatings.

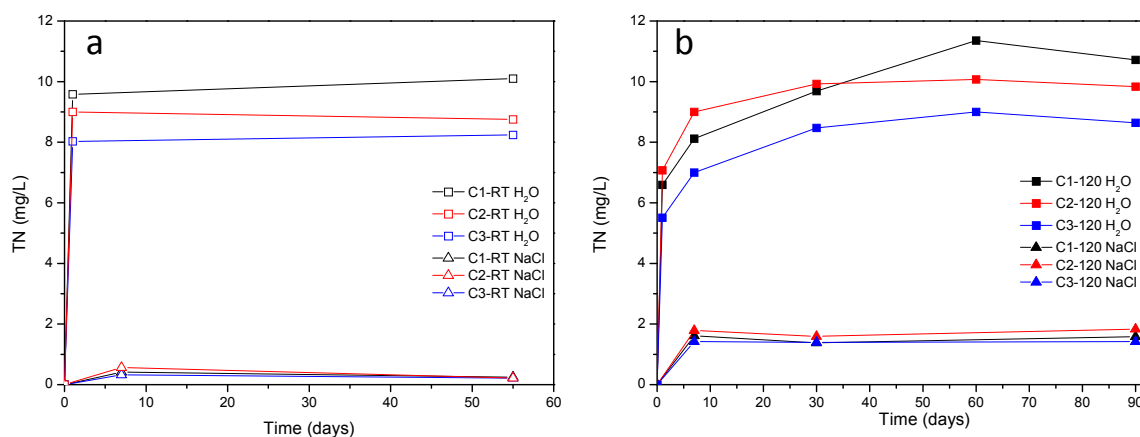

**Figure S2.** Evolution of the TN values of the solutions, after immersion in ultra-pure water and aqueous NaCl 1 M solution for different time periods of: (a) Uncured C1-RT, C2-RT, C3-RT polymeric coatings, and (b) Cured C1-120, C2-120, C3-120 polymeric coatings.

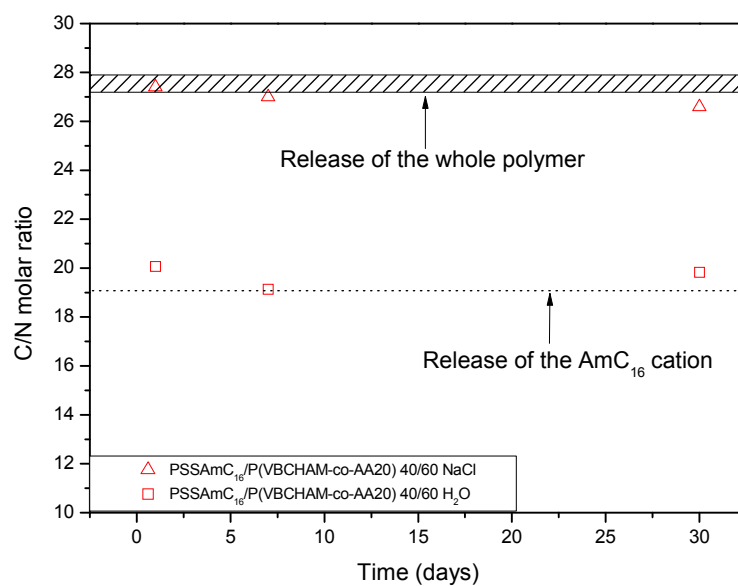

**Figure S3.** Evolution of the C/N molar ratio, determined from the TOC/TN studies, after immersion in ultra-pure water and NaCl 1 M for different time periods of uncured polymeric coatings PSSAmC<sub>16</sub>/P(VBCHAM-co-AA20) 40/60 w/w.
